# Supplementary material for: Bisphenol-A and Nonylphenol Induce Apoptosis in Reproductive Tract Cancer Cell Lines by the Activation of ADAM17
Source: MDPI journal article supplement (doi:10.3390/ijms19082238), 2018-07-31
Supplement: s1 [file s1]

## Supplementary Materials

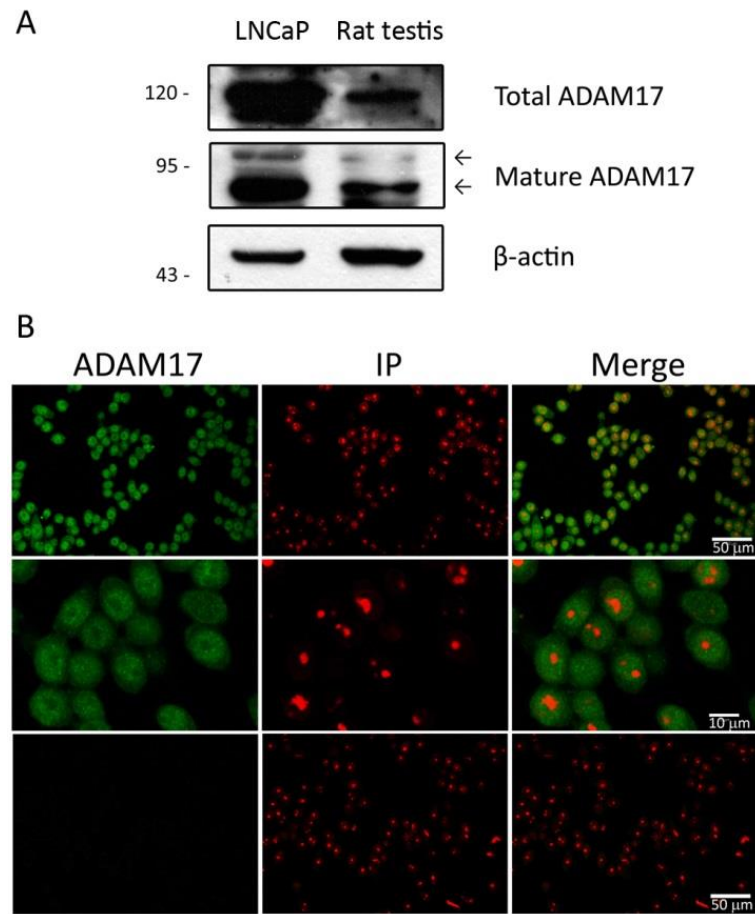

**Figure S1.** ADAM17 is expressed in LNCaP cell line. A) LNCaP cells and 21-day old rat testis (positive control) express immature and mature forms of ADAM17.  $\beta$ -actin was used as a loading control. B) The picture shows immunofluorescence against ADAM17 (green) in LNCaP cells; cell nuclei are in red stained with Propidium iodide (PI, red). Bars = 10 and 50  $\mu$ m.

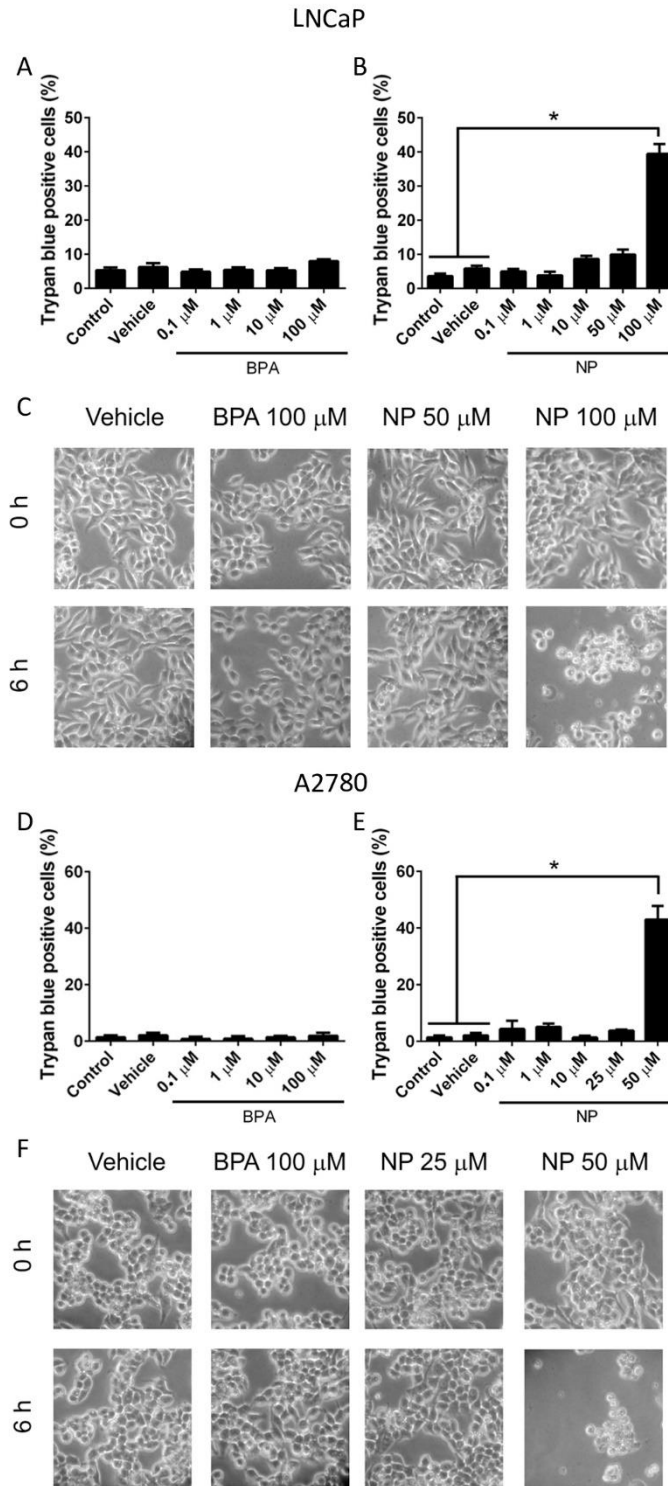

**Figure S2.** Trypan blue analysis after BPA and NP treatment. LNCaP cells were stimulated with different concentration of BPA (A) or NP (B) during 24 h. We observe an increase of Trypan blue positive cells with 100 μM NP but not with lower concentration or with BPA. (C) LNCaP contrast phase microscopy images at 0 h and 6 h of BPA and NP treatment. We observe changes in cellular morphology (cell death) only after treatment with 100 μM NP but not with 50 μM NP or 100 μM BPA. A2780 cells were stimulated with different concentration of BPA (D) or NP (E) during 2 h. We observe an increase of Trypan blue positive cells with 50 μM NP but not with lower concentration or with BPA. (F) A2780 contrast phase microscopy images at 0 h and 2 h of BPA and NP treatment. We observe changes in cellular morphology (cell death) only after treatment with 50 μM NP but not with 25 μM NP or 100 μM BPA. Vehicle: Ethanol, Mean ± SEM, \*  $p < 0.05$ ,  $n = 3$ .

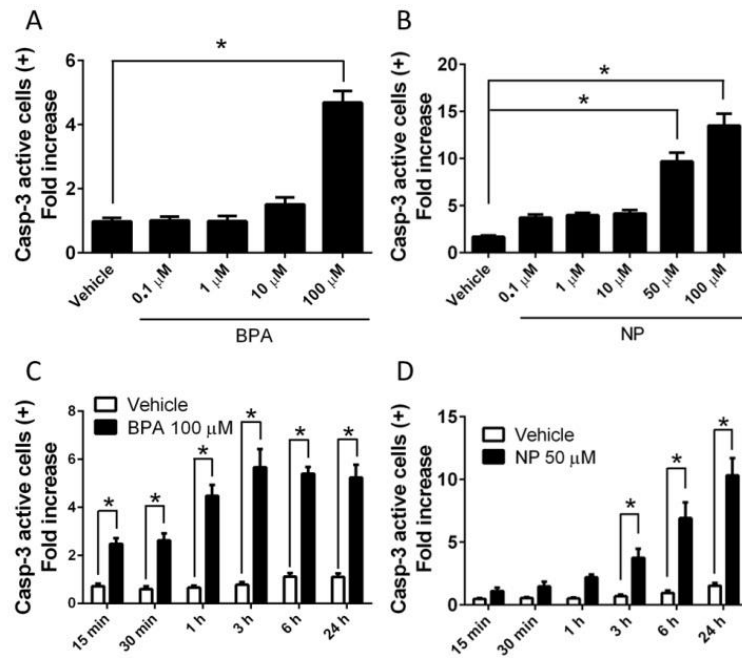

**Figure S3.** BPA and NP induce an increase of Caspase-3 active positive cells. Treatment with 100 μM BPA (A) or 50 and 100 μM NP (B) for 24 h induces a significant increase in the Caspase-3 active positive cell detected by immunohistochemistry. 100 μM BPA induces an increase in the Caspase-3 active positive cell from the 15 min of treatment (C), while 50 μM NP induces an increase from 3 h of treatment (D). Vehicle: Ethanol, Mean ± SEM, \*  $p < 0.05$ ,  $n = 3$ .

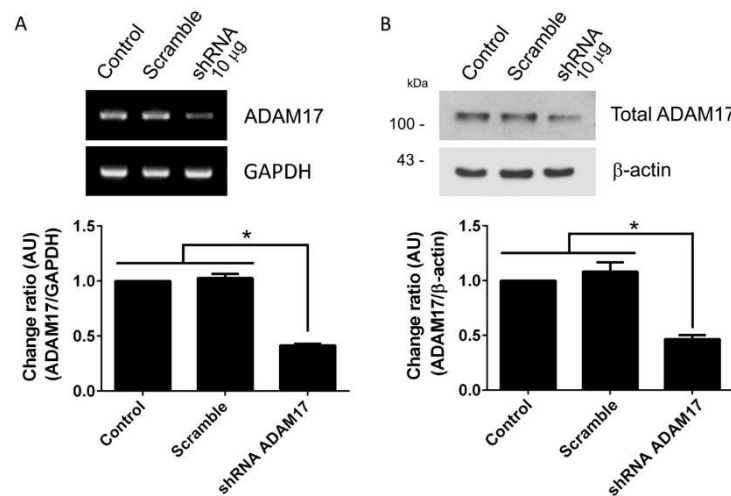

**Figure S4.** Transfection of A2780 cells with 10 μg of shRNA induces a robust decrease in the levels of ADAM17 mRNA (A) and protein (B). Mean ± SEM, \*  $p < 0.05$ ,  $n = 3$ .

Table S1: Phosphoproteins up- or down-regulated by 100  $\mu$ M BPA or 50  $\mu$ M NP in LNCaP cells after 15 min of treatment measured by a Human Phospho-Kinase Antibody Array.

| Kinase               | Phosphorylation Site | Change ratio (AU) |                  |                |
|----------------------|----------------------|-------------------|------------------|----------------|
|                      |                      | Control           | BPA(100 $\mu$ M) | NP(50 $\mu$ M) |
| p38                  | T180/Y182            | 1                 | 2.45             | 0.71           |
| ERK1/2               | T202/Y204, T185/Y187 | 1                 | 1.39             | 0.81           |
| JNKpan               | T183/185, T221/Y223  | 1                 | 1.38             | 0.66           |
| GSK-3 $\alpha/\beta$ | S21/S9               | 1                 | 1.75             | 0.66           |
| p53                  | S392                 | 1                 | 1.01             | 1.01           |
| EGF R                | Y1086                | 1                 | 2.83             | 1.15           |
| MSK1/2               | S376/S360            | 1                 | 1.70             | 1.01           |
| AMPK $\alpha$ 1      | T174                 | 1                 | 1.71             | 1.51           |
| Akt                  | S473                 | 1                 | 2.14             | 1.21           |
| Akt                  | T308                 | 1                 | 1.22             | 1.08           |
| p53                  | S46                  | 1                 | 1.00             | 1.00           |
| TOR                  | S2448                | 1                 | 1.98             | 1.27           |
| CREB                 | S133                 | 1                 | 3.05             | 0.95           |
| HSP27                | S78/S82              | 1                 | 2.65             | 1.43           |
| AMPK $\alpha$ 2      | T172                 | 1                 | 2.57             | 1.37           |
| p70 S6 Kinase        | T389                 | 1                 | 1.20             | 2.07           |
| p53                  | S15                  | 1                 | 1.01             | 1.00           |
| c-Jun                | S63                  | 1                 | 2.22             | 2.84           |
| Src                  | Y419                 | 1                 | 3.35             | 1.69           |
| Lyn                  | Y397                 | 1                 | 2.56             | 0.99           |
| Lck                  | Y394                 | 1                 | 3.48             | 1.41           |
| STAT2                | Y689                 | 1                 | 2.32             | 1.67           |
| STAT5a               | Y694                 | 1                 | 2.48             | 1.42           |
| p70 S6 Kinase        | T421/S424            | 1                 | 1.39             | 1.23           |
| RSK1/2/3             | S380/S386/S377       | 1                 | 1.17             | 1.17           |
| eNOS                 | S1177                | 1                 | 3.31             | 3.28           |
| Fyn                  | Y420                 | 1                 | 3.37             | 1.65           |
| Yes                  | Y426                 | 1                 | 2.97             | 1.07           |
| Fgr                  | Y412                 | 1                 | 3.26             | 1.61           |
| STAT6                | Y641                 | 1                 | 2.54             | 1.62           |
| STAT5b               | Y699                 | 1                 | 2.86             | 1.51           |
| STAT3                | Y705                 | 1                 | 1.04             | 0.98           |
| p27                  | T198                 | 1                 | 1.44             | 2.06           |
| PLC- $\gamma$ 1      | Y783                 | 1                 | 2.42             | 2.36           |
| Hck                  | Y411                 | 1                 | 1.99             | 1.51           |
| Chk-2                | T68                  | 1                 | 3.79             | 1.40           |
| FAK                  | Y397                 | 1                 | 2.42             | 1.16           |
| PDGF R $\beta$       | Y751                 | 1                 | 1.91             | 1.44           |

|          |           |   |      |      |
|----------|-----------|---|------|------|
| STAT5a/b | Y694/Y699 | 1 | 3.64 | 2.81 |
| STAT3    | S727      | 1 | 0.92 | 0.95 |
| WNK1     | T60       | 1 | 1.05 | 1.13 |
| PYK2     | Y402      | 1 | 6.01 | 8.62 |
| PRAS40   | T246      | 1 | 2.84 | 2.13 |
